# Supplementary material
Source: publisher figshare collection journal article supplement (https://acs.figshare.com/ndownloader/files/5108290)
Supplement: Supplementary file 1 [file 5108290]

REMARK 888
REMARK 888 WRITTEN BY MAESTRO (A PRODUCT OF SCHRODINGER, LLC)
TITLE     ****
MODEL        1
HETATM    1  C1  UNK     1       0.536  -1.413   5.844  1.00  0.00           C
HETATM    2  C2  UNK     1       0.229   1.344   5.966  1.00  0.00           C
HETATM    3  C3  UNK     1       0.339  -0.648   4.661  1.00  0.00           C
HETATM    4  C4  UNK     1       0.580  -0.829   7.092  1.00  0.00           C
HETATM    5  C5  UNK     1       0.424   0.572   7.121  1.00  0.00           C
HETATM    6  C6  UNK     1       0.173   0.728   4.661  1.00  0.00           C
HETATM    7  C9  UNK     1      -0.058   1.469   3.472  1.00  0.00           C
HETATM    8  C10 UNK     1      -0.295   2.068   2.441  1.00  0.00           C
HETATM    9  C11 UNK     1       0.102   2.757   6.097  1.00  0.00           C
HETATM   10  C13 UNK     1       0.012   3.957   6.229  1.00  0.00           C
HETATM   11  C14 UNK     1      -0.632   2.728   1.228  1.00  0.00           C
HETATM   12  C15 UNK     1      -1.410   3.921  -1.225  1.00  0.00           C
HETATM   13  C16 UNK     1      -0.244   2.175   0.000  1.00  0.00           C
HETATM   14  C17 UNK     1      -1.410   3.921   1.225  1.00  0.00           C
HETATM   15  C18 UNK     1      -1.771   4.495   0.000  1.00  0.00           C
HETATM   16  C19 UNK     1      -0.632   2.728  -1.228  1.00  0.00           C
HETATM   17  C22 UNK     1       0.358  -2.553   1.153  1.00  0.00           C
HETATM   18  C23 UNK     1       0.576  -3.964  -1.157  1.00  0.00           C
HETATM   19  C24 UNK     1       0.576  -3.964   1.157  1.00  0.00           C
HETATM   20  C25 UNK     1       0.230  -1.785   0.000  1.00  0.00           C
HETATM   21  C26 UNK     1       0.358  -2.553  -1.153  1.00  0.00           C
HETATM   22  C27 UNK     1       0.693  -4.734   0.000  1.00  0.00           C
HETATM   23  C30 UNK     1      -0.295   2.068  -2.441  1.00  0.00           C
HETATM   24  C31 UNK     1      -0.058   1.469  -3.472  1.00  0.00           C
HETATM   25  C32 UNK     1      -1.849   4.525   2.438  1.00  0.00           C
HETATM   26  C34 UNK     1      -2.246   5.049   3.453  1.00  0.00           C
HETATM   27  C35 UNK     1      -1.849   4.525  -2.438  1.00  0.00           C
HETATM   28  C37 UNK     1      -2.246   5.049  -3.453  1.00  0.00           C
HETATM   29  C38 UNK     1       0.339  -0.648  -4.661  1.00  0.00           C
HETATM   30  C39 UNK     1       0.424   0.572  -7.121  1.00  0.00           C
HETATM   31  C40 UNK     1       0.536  -1.413  -5.844  1.00  0.00           C
HETATM   32  C41 UNK     1       0.173   0.728  -4.661  1.00  0.00           C
HETATM   33  C42 UNK     1       0.229   1.344  -5.966  1.00  0.00           C
HETATM   34  C43 UNK     1       0.580  -0.829  -7.092  1.00  0.00           C
HETATM   35  C46 UNK     1       0.102   2.757  -6.097  1.00  0.00           C
HETATM   36  C48 UNK     1       0.012   3.957  -6.229  1.00  0.00           C
HETATM   37  C49 UNK     1       0.620  -2.670   5.039  1.00  0.00           C
HETATM   38  C50 UNK     1       0.632  -3.968   2.651  1.00  0.00           C
HETATM   39  C51 UNK     1       0.810  -4.021   5.053  1.00  0.00           C
HETATM   40  C52 UNK     1       0.417  -1.880   3.829  1.00  0.00           C
HETATM   41  C53 UNK     1       0.418  -2.528   2.642  1.00  0.00           C
HETATM   42  C54 UNK     1       0.819  -4.712   3.781  1.00  0.00           C
HETATM   43  C57 UNK     1       0.620  -2.670  -5.039  1.00  0.00           C
HETATM   44  C58 UNK     1       0.632  -3.968  -2.651  1.00  0.00           C
HETATM   45  C59 UNK     1       0.810  -4.021  -5.053  1.00  0.00           C
HETATM   46  C60 UNK     1       0.417  -1.880  -3.829  1.00  0.00           C
HETATM   47  C61 UNK     1       0.418  -2.528  -2.642  1.00  0.00           C
HETATM   48  C62 UNK     1       0.819  -4.712  -3.781  1.00  0.00           C
HETATM   49  H7  UNK     1       0.728  -1.389   8.010  1.00  0.00           H
HETATM   50  H8  UNK     1       0.457   1.092   8.072  1.00  0.00           H
HETATM   51  H12 UNK     1      -0.058   5.016   6.327  1.00  0.00           H
HETATM   52  H20 UNK     1       0.371   1.284   0.000  1.00  0.00           H
HETATM   53  H21 UNK     1      -2.367   5.400   0.000  1.00  0.00           H
HETATM   54  H28 UNK     1       0.052  -0.717   0.000  1.00  0.00           H
HETATM   55  H29 UNK     1       0.870  -5.804   0.000  1.00  0.00           H
HETATM   56  H33 UNK     1      -2.595   5.492   4.357  1.00  0.00           H
HETATM   57  H36 UNK     1      -2.595   5.492  -4.357  1.00  0.00           H
HETATM   58  H44 UNK     1       0.728  -1.389  -8.010  1.00  0.00           H
HETATM   59  H45 UNK     1       0.457   1.092  -8.072  1.00  0.00           H
HETATM   60  H47 UNK     1      -0.058   5.016  -6.327  1.00  0.00           H
HETATM   61  H55 UNK     1       0.963  -4.580   5.971  1.00  0.00           H
HETATM   62  H56 UNK     1       0.982  -5.785   3.752  1.00  0.00           H
HETATM   63  H63 UNK     1       0.963  -4.580  -5.971  1.00  0.00           H
HETATM   64  H64 UNK     1       0.982  -5.785  -3.752  1.00  0.00           H
CONECT    1    3    4   37
CONECT    1    4
CONECT    2    5    6    9
CONECT    2    5
CONECT    3    1    6   40
CONECT    3    6
CONECT    4    1   49    5
CONECT    4    1
CONECT    5    2    4   50
CONECT    5    2
CONECT    6    2    3    7
CONECT    6    3
CONECT   49    4
CONECT   50    5
CONECT    7    6    8
CONECT    7    8
CONECT    7    8
CONECT    8    7   11
CONECT    8    7
CONECT    8    7
CONECT    9    2   10
CONECT    9   10
CONECT    9   10
CONECT   51   10
CONECT   10    9   51
CONECT   10    9
CONECT   10    9
CONECT   11    8   13   14
CONECT   11   13
CONECT   12   15   16   27
CONECT   12   16
CONECT   13   11   52   16
CONECT   13   11
CONECT   14   11   15   25
CONECT   14   15
CONECT   15   12   14   53
CONECT   15   14
CONECT   16   12   13   23
CONECT   16   12
CONECT   52   13
CONECT   53   15
CONECT   17   19   20   41
CONECT   17   20
CONECT   18   21   22   44
CONECT   18   21
CONECT   19   17   22   38
CONECT   19   22
CONECT   20   17   54   21
CONECT   20   17
CONECT   21   18   20   47
CONECT   21   18
CONECT   22   18   19   55
CONECT   22   19
CONECT   54   20
CONECT   55   22
CONECT   23   16   24
CONECT   23   24
CONECT   23   24
CONECT   24   23   32
CONECT   24   23
CONECT   24   23
CONECT   25   14   26
CONECT   25   26
CONECT   25   26
CONECT   56   26
CONECT   26   25   56
CONECT   26   25
CONECT   26   25
CONECT   27   12   28
CONECT   27   28
CONECT   27   28
CONECT   57   28
CONECT   28   27   57
CONECT   28   27
CONECT   28   27
CONECT   29   31   32   46
CONECT   29   32
CONECT   30   59   33   34
CONECT   30   33
CONECT   31   29   34   43
CONECT   31   34
CONECT   32   24   29   33
CONECT   32   29
CONECT   33   30   32   35
CONECT   33   30
CONECT   34   30   31   58
CONECT   34   31
CONECT   58   34
CONECT   59   30
CONECT   35   33   36
CONECT   35   36
CONECT   35   36
CONECT   60   36
CONECT   36   35   60
CONECT   36   35
CONECT   36   35
CONECT   37    1   40   39
CONECT   37   39
CONECT   38   19   41   42
CONECT   38   42
CONECT   39   37   61   42
CONECT   39   37
CONECT   40    3   37   41
CONECT   40   41
CONECT   41   17   38   40
CONECT   41   40
CONECT   42   38   39   62
CONECT   42   38
CONECT   61   39
CONECT   62   42
CONECT   43   31   46   45
CONECT   43   45
CONECT   44   18   47   48
CONECT   44   48
CONECT   45   43   63   48
CONECT   45   43
CONECT   46   29   43   47
CONECT   46   47
CONECT   47   21   44   46
CONECT   47   46
CONECT   48   44   45   64
CONECT   48   44
CONECT   63   45
CONECT   64   48
ENDMDL
END   
